# Supplementary material for: The molecular mechanism of serum exosome miR-133b regulating the proliferation and apoptosis of vaginal smooth muscle cells by targeting AXUD1 to regulate Wnt / β-catenin signaling pathway
Source: Research Square preprint supplement (doi:10.21203/rs.3.rs-7541715/v1), 2025-10-17
Supplement: Supplementary file 1 [file dd784b54f4b8672cf9d2a213.docx]

Table I. Comparison of baseline data between POP group and control group

| Variable | Control（n=20） | POP(n=20) | *P* |
| --- | --- | --- | --- |
| Age ( years, mean ± SD ) | 53.0±3.207 | 56.2±6.837 | 0.112 |
| BMI ( KG /m2, mean ± SD ) | 25.61±3.581 | 24.56±2.081 | 0.2638 |
| Median ( range ) | 2（0-5） | 3（1-9） | 0.3015 |
| Number of vaginal delivery ( median, range ) | 2（0-5） | 2（1-5） | 0.3103 |

### Table II. Primer sequences of the analyzed genes.

| Gene | Sequence (5'‑3') |
| --- | --- |
| miR-133b | F:ACGTATGCTTTGGTCCCCTTCAA |
| miR-133b | R: ATCCAGTGCAGGGTCCGAGG |
| U6 | F: CTCGCTTCGGCAGCACA |
| U6 | R: AACGCTTCACGAATTTGCGT |
| miR-133b | F: ACGTATGCTTTGGTCCCCTTCAA |
| miR-133b | R: ATCCAGTGCAGGGTCCGAGG |
| U6 | F: CTCGCTTCGGCAGCACA |
| AXUD1 | F: TGGCCGGTTGGAAGAAGTG |
| AXUD1 | R: GCAGATCCTATCGCAGTGACAG |
| Wnt16 | F: TTCAGACACGAGAGATGGAACT |
| Wnt16 | R: CCAGCCTTCACTTGCTGAG |
| β-Catenin | F: AGCTTCCAGACACGCTATCAT |
| β-Catenin | R: CGGTACAACGAGCTGTTTCTAC |
| Bax | F: TGGTCCAGGGTTTCTTACTCC |
| Bax | R: TGGTCCAGGGTTTCTTACTCC |
| Bcl-2 | F: TGGTCCAGGGTTTCTTACTCC |
| Bcl-2 | R: TGGTCCAGGGTTTCTTACTCC |
| Caspase-3 | F: GCTGTGCTTCGTTAGTGT |
| Caspase-3 | R: GAACCAAGAACCGCTCAT |
| GAPDH | F: GGTTGTCTCCTGCGACTTCA |
| GAPDH | R: TGGTCCAGGGTTTCTTACTCC |
